# Supplementary material for: Effect of fingolimod on health-related quality of life in paediatric patients with multiple sclerosis: results from the phase 3 PARADIGMS Study
Source: HighWire-hosted journal article supplement (doi:10.1136/bmjno-2021-000215), 2022-02-01
Supplement: bmjno-2021-000215supp001_data_supplement.pdf [file bmjno-2021-000215supp001_data_supplement.pdf]

**Table of contents**

|                                                                                                                                                                                                                                                                                        |          |
|----------------------------------------------------------------------------------------------------------------------------------------------------------------------------------------------------------------------------------------------------------------------------------------|----------|
| <b>Supplementary Table 1. Patient disposition[1] .....</b>                                                                                                                                                                                                                             | <b>2</b> |
| <b>Supplementary Table 2. Mean change in PedsQL subscales per the self- and parent-reporting scores presented by (a) occurrence of confirmed relapses during the study, (b) number of relapses in the last 2 years prior to the start of the study and (c) EDSS status at EOS.....</b> | <b>4</b> |
| <b>References .....</b>                                                                                                                                                                                                                                                                | <b>7</b> |

**Supplementary Table 1. Patient disposition[1]**

| <b>Disposition categories</b>          | <b>n (%)</b>       |                           |
|----------------------------------------|--------------------|---------------------------|
| <b>Screened</b>                        | <b>348</b>         |                           |
| <b>Excluded</b>                        | <b>133 (38.2%)</b> |                           |
| Did not meet inclusion criterion       | 13 (3.7%)          |                           |
| Met exclusion criterion                | 105 (30.2%)        |                           |
| Withdrew consent                       | 7 (2.0%)           |                           |
| Had intercurrent medical event         | 1 (0.3%)           |                           |
| Had other reasons                      | 7 (2.0%)           |                           |
| <b>Randomized</b>                      | <b>215</b>         |                           |
|                                        | <b>Fingolimod</b>  | <b>Interferon beta-1a</b> |
|                                        | 107                | 108                       |
| Were included in the full analysis set | 107 (100%)         | 107 (99.1%)               |
| Were included in the safety            | 107 (100%)         | 107 (99.1%)               |
| <b>Discontinuations</b>                |                    |                           |
| Discontinued trial                     | 7 (6.5%)           | 20 (18.5%)                |
| Withdrew consent                       | 3 (2.8%)           | 5 (4.6%)                  |
| Had adverse event                      | 3 (2.8%)           | 2 (1.9%)                  |
| Were withdrawn by physician            | 1 (0.9%)           | 2 (1.9%)                  |
| Had unsatisfactory therapeutic effect  | -                  | 7 (6.5%)                  |
| Withdrew or were withdrawn by guardian | -                  | 2 (1.9%)                  |

---

|                                  |             |            |
|----------------------------------|-------------|------------|
| Had administrative problem       | -           | 1 (0.9%)   |
| Had protocol violation           | -           | 1 (0.9%)   |
| Completed trial                  | 100 (93.5%) | 88 (81.5%) |
| Were receiving trial regimen     | 99 (92.5%)  | 81 (75.0%) |
| Were not receiving trial regimen | 1 (0.9%)    | 7 (6.5%)   |

---

**Supplementary Table 2. Mean change in PedsQL subscales per the self- and parent-reporting scores presented by (a) occurrence of confirmed relapses during the study, (b) number of relapses in the last 2 years prior to the start of the study and (c) EDSS status at EOS**

(a)

| Occurrence of confirmed relapses during the study |                 |                    |                 |                    |                    |                    |                 |                    |
|---------------------------------------------------|-----------------|--------------------|-----------------|--------------------|--------------------|--------------------|-----------------|--------------------|
| Subgroups                                         | Free of relapse |                    |                 |                    | At least 1 relapse |                    |                 |                    |
| Treatment                                         | Fingolimod      |                    | IFN $\beta$ -1a |                    | Fingolimod         |                    | IFN $\beta$ -1a |                    |
| Time point                                        | Baseline        | Mean change at EOS | Baseline        | Mean change at EOS | Baseline           | Mean change at EOS | Baseline        | Mean change at EOS |
| <b>Self-reported</b>                              | (n=85)          |                    | (n=43)          |                    | (n=14)             |                    | (n=52)          |                    |
| Physical Health Summary Score                     | 81.73           | 4.37**             | 85.54           | -2.18              | 73.88              | 3.13               | 80.59           | -4.09              |
| Psychosocial Health Summary Score                 | 77.10           | 4.88**             | 79.11           | -0.58              | 74.29              | 3.93               | 78.56           | -2.44              |
| Emotional Functioning                             | 71.65           | 5.59*              | 75.12           | -0.23              | 67.86              | 6.79               | 76.06           | -4.81              |
| Social Functioning                                | 90.59           | 2.00               | 91.16           | 0.35               | 91.07              | -2.50              | 88.75           | -2.31              |
| School Functioning                                | 69.06           | 6.94*              | 71.05           | -1.86              | 63.93              | 7.50               | 70.87           | -0.19              |
| <b>Parent reported</b>                            | (n=83)          |                    | (n=46)          |                    | (n=15)             |                    | (n=47)          |                    |
| Physical Health Summary Score                     | 80.99           | 2.97               | 83.55           | -1.55              | 62.92              | -1.67              | 78.86           | -5.87              |
| Psychosocial Health Summary Score                 | 74.86           | 3.64               | 78.46           | 1.54               | 68.00              | 4.22               | 75.50           | -2.49              |
| Emotional Functioning                             | 68.86           | 5.54               | 74.67           | 1.20               | 67.33              | -1.00              | 70.96           | -2.55              |
| Social Functioning                                | 87.65           | 2.77               | 89.28           | 2.03               | 78.00              | 5.00               | 85.00           | -2.69              |
| School Functioning                                | 68.07           | 2.62               | 71.47           | 1.36               | 58.67              | 8.67               | 70.53           | -2.23              |

\* p $\leq$ 0.1; \*\*p $\leq$ 0.05  
p-value is from the Wilcoxon rank sum test and represent significant effect of fingolimod versus IFN  $\beta$ -1a  
EOS, end of study; IFN, interferon; n, number of subjects with a value at both baseline and end of study; PedsQL, Pediatric Quality of Life

(b)

| Number of relapses in the last 2 years prior to the start of the study |            |                    |          |                    |              |                    |          |                    |             |                    |          |                    |
|------------------------------------------------------------------------|------------|--------------------|----------|--------------------|--------------|--------------------|----------|--------------------|-------------|--------------------|----------|--------------------|
| Subgroups                                                              | ≤1 relapse |                    |          |                    | 2–3 relapses |                    |          |                    | >3 relapses |                    |          |                    |
| Treatment                                                              | Fingolimod |                    | IFN β-1a |                    | Fingolimod   |                    | IFN β-1a |                    | Fingolimod  |                    | IFN β-1a |                    |
| Time point                                                             | Baseline   | Mean change at EOS | Baseline | Mean change at EOS | Baseline     | Mean change at EOS | Baseline | Mean change at EOS | Baseline    | Mean change at EOS | Baseline | Mean change at EOS |
| <b>Self-reported</b>                                                   | (n=26)     |                    | (n=18)   |                    | (n=54)       |                    | (n=59)   |                    | (n=19)      |                    | (n=18)   |                    |
| Physical Health Summary Score                                          | 85.70      | 2.28               | 84.72    | -2.26              | 78.65        | 3.35*              | 83.42    | -2.54              | 79.28       | 9.21**             | 78.99    | -6.42              |
| Psychosocial Health Summary Score                                      | 79.29      | 2.69               | 80.93    | 0.00               | 74.88        | 5.83***            | 79.46    | -2.29              | 78.33       | 4.47               | 74.54    | -0.93              |
| Emotional Functioning                                                  | 73.65      | 4.62               | 77.50    | -2.78              | 69.72        | 6.94***            | 75.93    | -3.22              | 71.58       | 3.95               | 72.78    | -1.11              |
| Social Functioning                                                     | 93.65      | -1.35              | 95.00    | -0.56              | 88.43        | 3.98**             | 90.00    | -1.78              | 92.89       | -2.37              | 84.17    | 0.56               |
| School Functioning                                                     | 70.58      | 4.81               | 70.28    | 3.33               | 66.48        | 6.39**             | 72.46    | -1.86              | 70.53       | 11.84              | 66.67    | -2.22              |
| <b>Parent reported</b>                                                 | (n=26)     |                    | (n=20)   |                    | (n=55)       |                    | (n=58)   |                    | (n=17)      |                    | (n=15)   |                    |
| Physical Health Summary Score                                          | 85.46      | -2.16              | 84.06    | -6.72              | 78.30        | 1.19               | 81.46    | -2.16              | 66.91       | 12.50**            | 76.25    | -5.83              |
| Psychosocial Health Summary Score                                      | 76.86      | 1.28               | 77.83    | -0.33              | 73.12        | 4.16               | 77.11    | 0.70               | 71.37       | 6.08*              | 75.22    | -5.33              |
| Emotional Functioning                                                  | 72.69      | 0.77               | 74.25    | -3.00              | 66.27        | 7.82               | 72.84    | 1.47               | 70.00       | -0.29              | 70.67    | -6.00              |
| Social Functioning                                                     | 89.04      | 3.27               | 91.25    | -0.75              | 85.18        | 2.45               | 86.84    | 0.64               | 85.00       | 5.00               | 82.67    | -3.67              |
| School Functioning                                                     | 68.85      | -0.19              | 68.00    | 2.75               | 67.91        | 2.23               | 71.68    | -0.04              | 59.12       | 13.53**            | 72.33    | -6.33              |

\* p≤0.1; \*\*p≤0.05; \*\*\*p≤0.01  
p-values are from the Wilcoxon rank sum test and represent significant effect of fingolimod versus IFN β-1a  
EOS, end of study; IFN, interferon; n, number of subjects with a value at both baseline and end of study; PedsQL, Pediatric Quality of Life

(c)

| EDSS status at EOS                |            |                    |                 |                    |            |                    |                 |                    |              |                    |                 |                    |
|-----------------------------------|------------|--------------------|-----------------|--------------------|------------|--------------------|-----------------|--------------------|--------------|--------------------|-----------------|--------------------|
| Subgroups                         | Improved   |                    |                 |                    | Stable     |                    |                 |                    | Deteriorated |                    |                 |                    |
| Treatment                         | Fingolimod |                    | IFN $\beta$ -1a |                    | Fingolimod |                    | IFN $\beta$ -1a |                    | Fingolimod   |                    | IFN $\beta$ -1a |                    |
| Time point                        | Baseline   | Mean change at EOS | Baseline        | Mean change at EOS | Baseline   | Mean change at EOS | Baseline        | Mean change at EOS | Baseline     | Mean change at EOS | Baseline        | Mean change at EOS |
| <b>Self-reported</b>              | (n=22)     |                    | (n=10)          |                    | (n=67)     |                    | (n=66)          |                    | (n=8)        |                    | (n=19)          |                    |
| Physical Health Summary Score     | 76.42      | 13.07*             | 80.00           | 0.63               | 84.10      | 1.25               | 85.65           | -0.95              | 67.19        | 1.17               | 74.51           | -13.16             |
| Psychosocial Health Summary Score | 74.47      | 10.68              | 72.33           | 5.83               | 78.13      | 3.40*              | 79.95           | -1.62              | 72.08        | 0.00               | 78.25           | -5.44              |
| Emotional Functioning             | 67.50      | 11.59              | 68.00           | 6.00               | 72.16      | 4.70*              | 77.12           | -2.88              | 71.25        | 0.00               | 74.47           | -6.84              |
| Social Functioning                | 92.27      | 2.95               | 86.50           | 2.50               | 91.42      | 0.82               | 91.59           | -1.36              | 80.00        | 0.63               | 85.53           | -2.11              |
| School Functioning                | 63.64      | 17.50              | 62.50           | 9.00               | 70.82      | 4.55               | 71.14           | -0.61              | 65.00        | -0.63              | 74.74           | -7.37              |
| <b>Parent reported</b>            | (n=21)     |                    | (n=11)          |                    | (n=66)     |                    | (n=63)          |                    | (n=10)       |                    | (n=19)          |                    |
| Physical Health Summary Score     | 77.23      | 8.93               | 77.56           | 0.85               | 79.69      | 1.52               | 83.62           | -2.64              | 73.13        | -8.13              | 75.16           | -10.03             |
| Psychosocial Health Summary Score | 71.19      | 10.17              | 70.61           | 11.67              | 74.27      | 2.65               | 77.79           | 0.24               | 78.83        | -4.00              | 77.89           | -10.00             |
| Emotional Functioning             | 63.10      | 13.57              | 64.55           | 13.64              | 69.32      | 3.94               | 73.49           | 1.51               | 78.00        | -10.00             | 75.26           | -16.32             |
| Social Functioning                | 88.33      | 5.71               | 85.00           | 8.64               | 85.61      | 2.42               | 88.44           | 0.19               | 88.00        | -0.50              | 83.95           | -7.37              |
| School Functioning                | 62.14      | 11.31              | 62.27           | 12.73              | 67.88      | 1.59               | 71.47           | -0.99              | 70.50        | -1.50              | 74.47           | -6.32              |

\*p $\leq$ 0.05  
p-value is from the Wilcoxon rank sum test and represent significant effect of fingolimod vs. IFN  $\beta$ -1a  
For patients with a baseline EDSS score of  $\leq$ 5.0, a decrease of  $\leq$ 1 point is defined as improvement, a change from -0.5 to 0.5 is defined as stable and an increase of  $\geq$ 1 point is defined as deterioration; for patients with a baseline EDSS score of  $>$ 5.0, a decrease of  $\leq$ 0.5 point is defined as improvement, zero change is defined as stable and an increase of  $\geq$ 0.5 point is defined as deterioration  
EDSS, Expanded Disability Status Scale; EOS, end of study; IFN, interferon; n, number of subjects with a value at both baseline and end of study; PedsQL, Pediatric Quality of Life

**References**

1. Chitnis T, Arnold DL, Banwell B, Bruck W, Ghezzi A, Giovannoni G, et al. Trial of fingolimod versus interferon beta-1a in pediatric multiple sclerosis. *N Engl J Med*. 2018;379(11):1017-27.
